# Supplementary material for: Electronic clinical decision support algorithms incorporating point-of-care diagnostic tests in low-resource settings: a target product profile
Source: PubMed Central journal article supplement — BMJ Glob Health. 2020 Feb 28;5(2):e002067. doi: 10.1136/bmjgh-2019-002067 (PMC7050342; doi:10.1136/bmjgh-2019-002067), 2020-02-28
Supplement: bmjgh-2019-002067supp001.pdf [file bmjgh-2019-002067supp001.pdf]

Supplementary File 1: First draft (v.0) of the target product profile prepared by KP, SD, RS, ZK, FM, and GLM and shared prior to the FIND/WHO workshop in November 2018

| SCOPE GENERAL                                              |                                                                                                                                                                                                                                                                                                                                                                                                                               |                                                                  |                                                                                                                                                                                                                                                                     |
|------------------------------------------------------------|-------------------------------------------------------------------------------------------------------------------------------------------------------------------------------------------------------------------------------------------------------------------------------------------------------------------------------------------------------------------------------------------------------------------------------|------------------------------------------------------------------|---------------------------------------------------------------------------------------------------------------------------------------------------------------------------------------------------------------------------------------------------------------------|
| CHARACTERISTIC                                             | MINIMAL REQUIREMENT                                                                                                                                                                                                                                                                                                                                                                                                           | OPTIMAL REQUIREMENT                                              | COMMENT                                                                                                                                                                                                                                                             |
| Intended Use                                               | The toolkit, comprised of an electronic clinical decision support algorithm on mobile device and point of care diagnostic tests, is intended to increase evidence-based treatment decisions by capturing diagnostic test results, patient clinical data (i.e. temperature, respiratory rate, oxygen saturation) and context specific data (i.e. disease incidence, seasonality) to provide treatment and care recommendations |                                                                  |                                                                                                                                                                                                                                                                     |
| Target Population                                          | <ul style="list-style-type: none"> <li>— Children under 59 months of age presenting at health facilities, or</li> <li>— Children 2 - 59 months of age presenting at health facilities, or</li> <li>— Adolescents presenting at health facilities, or</li> <li>— Adults presenting at health facilities</li> </ul>                                                                                                             | Anyone presenting at a health facility                           | The minimal requirements are based on currently available WHO clinical care guidelines that have been developed for specific age groups. The optimal requirement allows for anyone who shows up at a health facility to be assessed using an appropriate algorithm. |
| Setting (level of implementation in the healthcare system) | First level primary care settings where no or minimal laboratories are available (Level 1)                                                                                                                                                                                                                                                                                                                                    | Same, and community settings outside health facilities (Level 0) | Healthcare level is defined as in Ghani <i>et. al.</i> , 2015 <sup>i</sup>                                                                                                                                                                                          |
| Targeted End User                                          | Health care worker at first-level primary care settings (includes nurses, clinical officers, medical and physician assistants)                                                                                                                                                                                                                                                                                                | Same, and community health care workers                          | A healthcare worker, depending on the setting, can be a laboratory technician or a nurse and both can be using the toolkit- especially in places where diagnostic testing is performed in a laboratory and the consult by a nurse                                   |

| SCOPE TOOLKIT COMPONENTS                            |                                                                                                                                                                                        |                                                                                                                                                  |                                                                                                                                                                                            |
|-----------------------------------------------------|----------------------------------------------------------------------------------------------------------------------------------------------------------------------------------------|--------------------------------------------------------------------------------------------------------------------------------------------------|--------------------------------------------------------------------------------------------------------------------------------------------------------------------------------------------|
| CHARACTERISTIC                                      | MINIMAL REQUIREMENT                                                                                                                                                                    | OPTIMAL REQUIREMENT                                                                                                                              | COMMENT                                                                                                                                                                                    |
| Diagnostic Tests and Other Relevant Medical Devices | POCs <sup>1</sup> or other relevant medical devices prompted for use by the app shall be locally relevant, i.e. recommended by EDL or relevant national equivalent, or country program | Same and newly emerging diagnostic tools and medical devices relevant for the targeted settings                                                  |                                                                                                                                                                                            |
| Algorithm/Decision Logic                            | Based on a WHO guideline decision tree (i.e. IMNCI <sup>2</sup> , iCCM <sup>3</sup> , IMAI <sup>4</sup> ) adaptable to country context and use cases                                   | New decision logic (such as probabilistic algorithms) adaptable to different country context and use cases, and approved by the local government |                                                                                                                                                                                            |
| Therapeutic Guidelines                              | Therapeutic recommendations shall be compliant with national treatment guidelines and national EML <sup>5</sup>                                                                        | Same and the app shall provide recommendations that support antimicrobial stewardship                                                            |                                                                                                                                                                                            |
| Compatible Devices                                  | <ul style="list-style-type: none"> <li>— Smartphone</li> <li>— Tablets</li> <li>— Computers</li> </ul>                                                                                 |                                                                                                                                                  | Computers are included as it may be necessary for health facility supervisors to access data collected at the facility level to make informed decisions (i.e. restocking medical supplies) |
| Compatible Operating Systems                        | Android for smart phones and tablets and windows for computers                                                                                                                         | OS <sup>6</sup> agnostic                                                                                                                         |                                                                                                                                                                                            |

<sup>1</sup> POC : Point of Care diagnostics

<sup>2</sup> IMNCI: Integrated Management of Neonatal and Childhood Illness

<sup>3</sup> iCCM: integrated Community Case Management

<sup>4</sup> IMAI: Integrated Management for Adolescent and Adult Illness

<sup>5</sup> EML: Essential Medicines List

<sup>6</sup> OS: Operating System

| FUNCTIONAL CHARACTERISTICS                                                                        |                                                                                                                                                                                                                                                                                       |                                                                                                                                                                                                                   |                                                                                                                                                                                                                                                                                                    |
|---------------------------------------------------------------------------------------------------|---------------------------------------------------------------------------------------------------------------------------------------------------------------------------------------------------------------------------------------------------------------------------------------|-------------------------------------------------------------------------------------------------------------------------------------------------------------------------------------------------------------------|----------------------------------------------------------------------------------------------------------------------------------------------------------------------------------------------------------------------------------------------------------------------------------------------------|
| CHARACTERISTIC                                                                                    | MINIMAL REQUIREMENT                                                                                                                                                                                                                                                                   | OPTIMAL REQUIREMENT                                                                                                                                                                                               | COMMENT                                                                                                                                                                                                                                                                                            |
| External Interface                                                                                | The electronic clinical decision-support algorithm is accessible through an App downloaded on the compatible target devices                                                                                                                                                           |                                                                                                                                                                                                                   |                                                                                                                                                                                                                                                                                                    |
| Data Access and Transparency                                                                      | All data collected via the App is visible to the App owner (i.e. the healthcare programme or research establishment) and available for transmission. The owner has control over the destination and content of all transmissions (no hidden data feeds to other opaque destinations). |                                                                                                                                                                                                                   |                                                                                                                                                                                                                                                                                                    |
| Access                                                                                            | The App should have publicly available standards based interface to allow transmission of data to user configured destinations (such as in-country lab information management systems)                                                                                                | Open source                                                                                                                                                                                                       | Open source: the software code is available for use and modification                                                                                                                                                                                                                               |
| Interoperability (Ability for systems to exchange data and subsequently present data to the user) | Data is structured, and uses commonly used, machine readable formats                                                                                                                                                                                                                  |                                                                                                                                                                                                                   | The app shall ideally interoperate with country relevant systems such as HIS, EHRs, national registries and surveillance systems. However, interoperability will vary from one country to the next. Therefore the data needs to be accessible and formatted for integration into different systems |
| Configurability                                                                                   | <ul style="list-style-type: none"> <li>— Language: UN official languages</li> <li>— Local time</li> <li>— Local weights and measures</li> </ul>                                                                                                                                       | <ul style="list-style-type: none"> <li>— Language: option to customise into country official language</li> <li>— Local time</li> <li>— Local weights and measures</li> <li>— Other country preferences</li> </ul> | Language can be a major barrier for the proper use of the tool for patient management and can lead to errors and misinterpretation                                                                                                                                                                 |
| Clinical Data Entry                                                                               | Manual entry by the operator                                                                                                                                                                                                                                                          | Automatic upload—allows integration with built-in and third party Apps and devices                                                                                                                                | This allows external integration of other modules, Apps and devices                                                                                                                                                                                                                                |
| POC Data Inputs                                                                                   | Qualitative data such as positive/negative/invalid lateral flow test results                                                                                                                                                                                                          | Same and quantitative data such as white blood cell count                                                                                                                                                         | This covers data from POCs that are inputted in the algorithm (i.e. RDTs, medical devices, biosensors)                                                                                                                                                                                             |
| Regulatory                                                                                        | POC diagnostic tests are regulatory approved and implemented in compliance with local regulations                                                                                                                                                                                     | All toolkit components are regulatory approved                                                                                                                                                                    |                                                                                                                                                                                                                                                                                                    |

|                        |                                                                                                            |                                                                                                                                                                                                                                                                                                                                |                                                                                                                                                                                                                                                                                                                                                                                                                                                            |
|------------------------|------------------------------------------------------------------------------------------------------------|--------------------------------------------------------------------------------------------------------------------------------------------------------------------------------------------------------------------------------------------------------------------------------------------------------------------------------|------------------------------------------------------------------------------------------------------------------------------------------------------------------------------------------------------------------------------------------------------------------------------------------------------------------------------------------------------------------------------------------------------------------------------------------------------------|
| Machine Learning       | None. The algorithm is static                                                                              | <p>Predictive model on cloud running in the back-end and not changing the decision logic</p> <p>Gating mechanisms are in place to trigger decisions for a change in the algorithm to go live</p>                                                                                                                               | <p>Minimal: Data is collected for ML<sup>7</sup> but the decision logic is not adapting. A new validated logic would be versioned and downloaded for use.</p> <p>Optimal: A gating mechanism is in place to allow a change in the algorithm to go live. Example: an alert algorithm for dengue is triggered based on historical surveillance data. The district officer approves the implementation of the change in the algorithm across the district</p> |
| Updates and Versioning | Manual update of new App version                                                                           | <ul style="list-style-type: none"> <li>— Automatic re-synchronisation with the new App version in the back-end without disrupting the user workflow</li> <li>— Any algorithmic logic in the App can change without updating the whole App</li> <li>— Approved peripherals can change without updating the whole App</li> </ul> |                                                                                                                                                                                                                                                                                                                                                                                                                                                            |
| Workflow               | Sequential: begin and end one consultation before starting a new one                                       | Simultaneous: start a new consultation while one is ongoing                                                                                                                                                                                                                                                                    | Ideally the health care worker can send patient 1 to the lab for diagnostic testing and can begin consulting Patient 2. Patient 1's consult resumes when lab tests are available                                                                                                                                                                                                                                                                           |
| Navigation             | Sequential: the user follows a strict sequence of data input to reach a final recommendation               | Non-sequential: the user can move in any direction through an assessment and change input data to reach a final recommendation                                                                                                                                                                                                 |                                                                                                                                                                                                                                                                                                                                                                                                                                                            |
| Task Management        | — No multitasking                                                                                          | <ul style="list-style-type: none"> <li>— Multiple patient windows can be opened at a time by one user</li> <li>— Patient profile can be recovered based on user access rights</li> <li>— Task shifting capability (i.e. move from one age-specific algorithm to another)</li> </ul>                                            |                                                                                                                                                                                                                                                                                                                                                                                                                                                            |
| Follow up              | Ability to retrieve patient information using patient registration information (i.e. anonymous patient ID) | Same and built-in function to send patient reminders via SMS or phone call                                                                                                                                                                                                                                                     |                                                                                                                                                                                                                                                                                                                                                                                                                                                            |

<sup>7</sup> ML: Machine Learning

| PERFORMANCE and SCALABILITY       |                                                                                                                                                                                                                                                                                                                                     |                                                                                                                                                                                                                                                                                                                               |                                                                                                                                                                                                                                                                                                  |
|-----------------------------------|-------------------------------------------------------------------------------------------------------------------------------------------------------------------------------------------------------------------------------------------------------------------------------------------------------------------------------------|-------------------------------------------------------------------------------------------------------------------------------------------------------------------------------------------------------------------------------------------------------------------------------------------------------------------------------|--------------------------------------------------------------------------------------------------------------------------------------------------------------------------------------------------------------------------------------------------------------------------------------------------|
| CHARACTERISTIC                    | MINIMAL REQUIREMENT                                                                                                                                                                                                                                                                                                                 | OPTIMAL REQUIREMENT                                                                                                                                                                                                                                                                                                           | COMMENT                                                                                                                                                                                                                                                                                          |
| Evidence of Impact                | <ol style="list-style-type: none"> <li>1) Equivalent clinical outcome compared to existing guidelines, if changes are made to previously validated clinical algorithms, and/or</li> <li>2) Equivalent adherence to clinical guidelines compared to existing guidelines, if previously validated algorithms are digitised</li> </ol> | <ol style="list-style-type: none"> <li>1) Improved clinical outcome compared to existing guidelines, if changes are made to previously validated clinical algorithms and/or</li> <li>2) Improved adherence to clinical guidelines compared to existing guidelines if previously validated algorithms are digitised</li> </ol> |                                                                                                                                                                                                                                                                                                  |
| Disease Risk Likelihood           | Based on pre-test probability                                                                                                                                                                                                                                                                                                       | Based on a pre-test probability <b>and</b> POC positive/negative predictive values                                                                                                                                                                                                                                            | <p>Minimal: application of a test is based on prevalence, patient data and assumptions on the population that increases the likelihood of having a particular disease.</p> <p>Optimal: disease risk is based on both pre-test probability and diagnostic positive/negative predictive values</p> |
| Patient Management Recommendation | Consultation data is summarised and actionable recommendations provided (treatment, referral, home care or follow up)                                                                                                                                                                                                               | Consultation data is summarised and actionable recommendations provided (treatment, referral, home care or follow up) <b>and</b> the recommendation is captured                                                                                                                                                               | Optimal: the user can select and submit the treatment and care provided. This data is recorded and can be used to evaluate guideline adherence (agreement between diagnosis and treatment) and monitor antimicrobial use                                                                         |
| Scalability                       | The App should allow high transaction volumes with complex workflows to cover primary care workforce at national scale                                                                                                                                                                                                              |                                                                                                                                                                                                                                                                                                                               |                                                                                                                                                                                                                                                                                                  |

| DATA CHARACTERISTICS        |                                                                                                                                                                                                                                                                                                                                                                                                                                                                                                         |                                                                               |                                                                                                                                                                                                                                                                                                    |
|-----------------------------|---------------------------------------------------------------------------------------------------------------------------------------------------------------------------------------------------------------------------------------------------------------------------------------------------------------------------------------------------------------------------------------------------------------------------------------------------------------------------------------------------------|-------------------------------------------------------------------------------|----------------------------------------------------------------------------------------------------------------------------------------------------------------------------------------------------------------------------------------------------------------------------------------------------|
| CHARACTERISTIC              | MINIMAL REQUIREMENT                                                                                                                                                                                                                                                                                                                                                                                                                                                                                     | OPTIMAL REQUIREMENT                                                           | COMMENT                                                                                                                                                                                                                                                                                            |
| Data Capture                | Text, numeric, image, audio, video                                                                                                                                                                                                                                                                                                                                                                                                                                                                      | Same, and GPS, barcode, biometric                                             |                                                                                                                                                                                                                                                                                                    |
| Data Storage                | Data is stored in a server/cloud accessible to high-level country authority on a web interface                                                                                                                                                                                                                                                                                                                                                                                                          | Data is stored in a server within the country                                 |                                                                                                                                                                                                                                                                                                    |
| Data Flow                   | De-identified output data can be exchanged with different authorities with authorization by local authorities                                                                                                                                                                                                                                                                                                                                                                                           | De-identified output data can be exchanged with different authorities         |                                                                                                                                                                                                                                                                                                    |
| Data Reporting              | Data export available from all target devices                                                                                                                                                                                                                                                                                                                                                                                                                                                           | Pre-built data reporting, analytics and dashboards are available with the App | The level of data manipulation, aggregations and reporting, should be sensitive to the device the App is running on. i.e. The computer App can be rich in functionality, the mobile App is optimised for data collection and transmission only                                                     |
| Data Provenance             | Included                                                                                                                                                                                                                                                                                                                                                                                                                                                                                                | Same                                                                          | Provides origin and processes applied to output data. When data is downloaded or shared, the version of the model is tagged so it is always clear how the data was obtained                                                                                                                        |
| Data Dictionary             | Available, referencing standards used                                                                                                                                                                                                                                                                                                                                                                                                                                                                   |                                                                               | Ensures indicators reported are uniform across different programs                                                                                                                                                                                                                                  |
| Data Security & Privacy     | <p>The App shall operate under secure connectivity, which meet data protection and regulations of individual countries to avoid loss and corruption of sensitive data, and mitigate cyber-attacks, whether data is at rest or in transmission.</p> <p>Conforms to national privacy laws. Includes processes such as:</p> <ul style="list-style-type: none"> <li>— Two factor authentication</li> <li>— Authorization/Access Control</li> <li>— De-identified data</li> <li>— Data encryption</li> </ul> |                                                                               | <p>Encourages GDPR<sup>8</sup> (should no national data security policies exist) to ensure a system that:</p> <ul style="list-style-type: none"> <li>— preserves data integrity</li> <li>— identifies and mitigates risks</li> <li>— provides relevant parties clear security processes</li> </ul> |
| Standards and Terminologies | Conforms to currently recognised ICT <sup>9</sup> standards such as HL7 <sup>10</sup> and FHIR <sup>11</sup> and disease and health terminologies such as SNOMED <sup>12</sup> and ICD <sup>13</sup>                                                                                                                                                                                                                                                                                                    |                                                                               |                                                                                                                                                                                                                                                                                                    |

<sup>8</sup> GDPR: General Data Privacy Regulation

<sup>9</sup> ICT: Information Communication Technology

<sup>10</sup> HL7: Health Level Seven International 7

<sup>11</sup> FHIR: Fast Healthcare Interoperability Resources

<sup>12</sup> SNOMED: Systematized Nomenclature of Medicine

<sup>13</sup> ICD: International Classification of Diseases

| OPERATIONAL CHARACTERISTICS |                                                                                                                                    |                                                                                                                                                                                  |                                                                                                                                                                        |
|-----------------------------|------------------------------------------------------------------------------------------------------------------------------------|----------------------------------------------------------------------------------------------------------------------------------------------------------------------------------|------------------------------------------------------------------------------------------------------------------------------------------------------------------------|
| CHARACTERISTIC              | MINIMAL REQUIREMENT                                                                                                                | OPTIMAL REQUIREMENT                                                                                                                                                              | COMMENT                                                                                                                                                                |
| Training                    | <ul style="list-style-type: none"> <li>— Live training for the App</li> <li>— Live training for POCs by local authority</li> </ul> | <ul style="list-style-type: none"> <li>— Remote training and/or remote “Train the Trainer” for the App component</li> <li>— Live training for POCs by local authority</li> </ul> | Health care workers may already be trained to use POCs but the input of the test result in the algorithm and interpretation of results may require additional training |
| User Access Rights          | Provides access to specific data and App features for users with different roles                                                   |                                                                                                                                                                                  | Roles may include: data manager (facility supervisor) or data entry person (nurse)                                                                                     |
| Expert Support              | None                                                                                                                               | Built-in access to online/remote expert advice to assist in patient consultation via SMS, audio call, video conferencing                                                         |                                                                                                                                                                        |
| Internet Availability       | <ul style="list-style-type: none"> <li>— Functions with zero connection</li> <li>— Allows automatic resynchronisation</li> </ul>   | Same and trigger alerts on user device when data has not been synchronised for a long time                                                                                       | Internet connection can be very instable therefore the tool should work in offline mode so as to not disrupt the workflow of the user                                  |

| COST, LICENSING, PROCUREMENT CHANNELS |                                                                                                                                                                                                                                                          |                                                                                                                                                                                                                       |         |
|---------------------------------------|----------------------------------------------------------------------------------------------------------------------------------------------------------------------------------------------------------------------------------------------------------|-----------------------------------------------------------------------------------------------------------------------------------------------------------------------------------------------------------------------|---------|
| CHARACTERISTIC                        | MINIMAL REQUIREMENT                                                                                                                                                                                                                                      | OPTIMAL REQUIREMENT                                                                                                                                                                                                   | COMMENT |
| Procurement Model                     | <ul style="list-style-type: none"> <li>— Individual components of the toolkits can be procured directly by a MoH<sup>14</sup> and through global procurement agencies</li> <li>— Maintenance support services</li> <li>— End-of-Life services</li> </ul> | <ul style="list-style-type: none"> <li>— Toolkit components are bundled and available via global procurement agencies<sup>15</sup></li> <li>— Maintenance support services</li> <li>— End-of-Life services</li> </ul> |         |

<sup>14</sup> MoH : Ministry of Health

<sup>15</sup> Examples of Global procurement agencies: [UNICEF Supply Division](#), [ASRAMES DRC](#), and [CHMP Kenya](#)



## References

---

'Ghani AC, Burgess DH, Reynolds A, Rousseau C. Expanding the role of diagnostic and prognostic tools for infectious diseases in resource-poor settings. *Nature*. 2015;528(7580):S50–2. Epub 2015/12/04. pmid:26633765.
