# Supplementary material for: Electronic clinical decision support algorithms incorporating point-of-care diagnostic tests in low-resource settings: a target product profile
Source: PubMed Central journal article supplement — BMJ Glob Health. 2020 Feb 28;5(2):e002067. doi: 10.1136/bmjgh-2019-002067 (PMC7050342; doi:10.1136/bmjgh-2019-002067), 2020-02-28
Supplement: bmjgh-2019-002067supp003.pdf [file bmjgh-2019-002067supp003.pdf]

**Supplemental File 3. Delphi round 1 and 2 expert respondent characteristics.**

|                                                    | Delphi Round 1 |                | Delphi Round 2 |                |
|----------------------------------------------------|----------------|----------------|----------------|----------------|
|                                                    | Number         | Percentage (%) | Number         | Percentage (%) |
| <b>Expert Respondents</b>                          | 28             | 100            | 23             | 100            |
| <b>Affiliation</b>                                 |                |                |                |                |
| Non-profit international organisation              | 7              | 25.0           | 7              | 30.4           |
| UN Agency                                          | 2              | 7.1            | 2              | 8.7            |
| Academic Institution                               | 10             | 35.7           | 7              | 30.4           |
| Funding Agency                                     | 1              | 3.6            | 1              | 4.3            |
| Research Institute                                 | 2              | 7.1            | 1              | 4.3            |
| Private                                            | 6              | 21.4           | 5              | 21.7           |
| <b>Country*</b>                                    |                |                |                |                |
| High-income                                        | 21             | 75.0           | 17             | 73.9           |
| Upper middle-income                                | 1              | 3.6            | 1              | 4.3            |
| Lower-middle income                                | 5              | 17.9           | 4              | 17.4           |
| Low-income                                         | 1              | 3.6            | 1              | 4.3            |
| <b>Field of Experience (&gt; 5 years)</b>          |                |                |                |                |
| Clinical practice                                  | 12             | 42.9           | 8              | 34.8           |
| Clinical research                                  | 12             | 42.9           | 10             | 43.5           |
| Diagnostic product development                     | 4              | 14.3           | 3              | 13.0           |
| Software development                               | 6              | 21.4           | 8              | 34.8           |
| Health programme implementation                    | 14             | 50.0           | 14             | 60.9           |
| LMICs                                              |                |                |                |                |
| Health Information System                          | 11             | 39.3           | 10             | 43.5           |
| <b>Experience by geographic region<sup>‡</sup></b> |                |                |                |                |
| African region                                     | 22             | 78.6           | 19             | 82.6           |
| Region of the Americas                             | 11             | 39.3           | 8              | 34.8           |
| South-East Asian region                            | 16             | 57.1           | 16             | 69.6           |

|                              |    |      |   |      |
|------------------------------|----|------|---|------|
| European region              | 10 | 35.7 | 6 | 26.1 |
| Eastern Mediterranean region | 3  | 10.7 | 3 | 13.0 |
| Western Pacific region       | 8  | 28.6 | 7 | 30.4 |

\* Income groups follow the World Bank Group's list of analytical income classification of economies, based on Gross National Income per capita (2018 data)<sup>i</sup>. <sup>α</sup> Regions are based on WHO classification.

<sup>i</sup> The World Bank Group. Country and Lending groups, country classification. Accessed April 22, 2019 <https://datahelpdesk.worldbank.org/knowledgebase/articles/906519-world-bank-country-and-lending-groups>
